# Supplementary material
Source: PubMed Central journal article supplement (PMC3683914)

**A**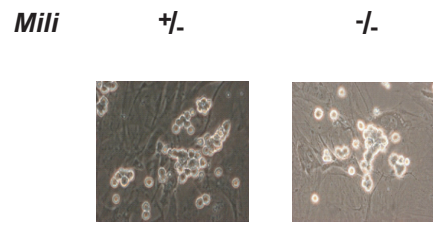**B**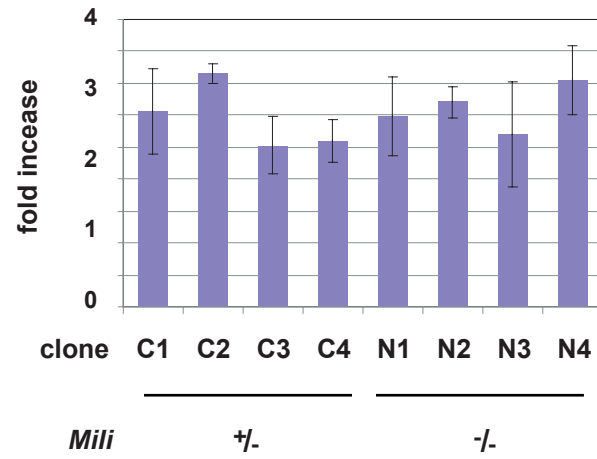 $P = 0.866$

**A**

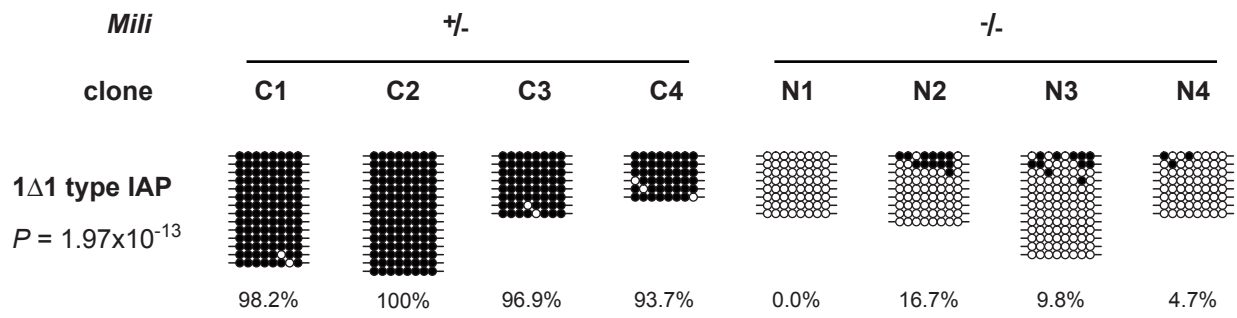

**B**

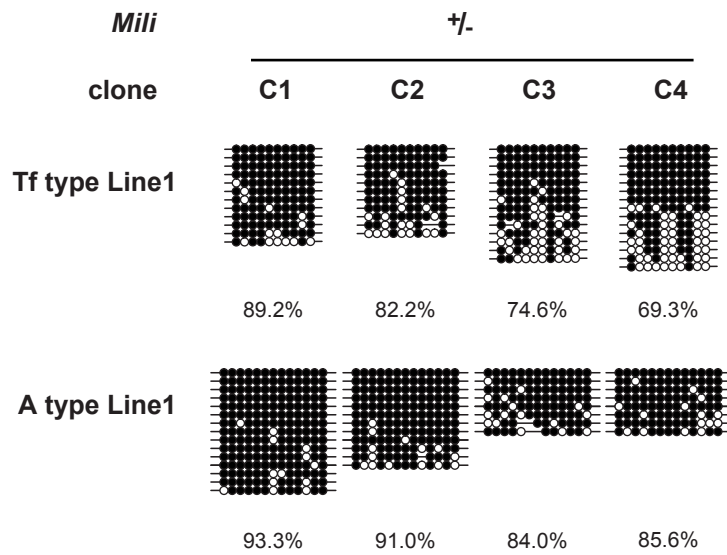

**C**

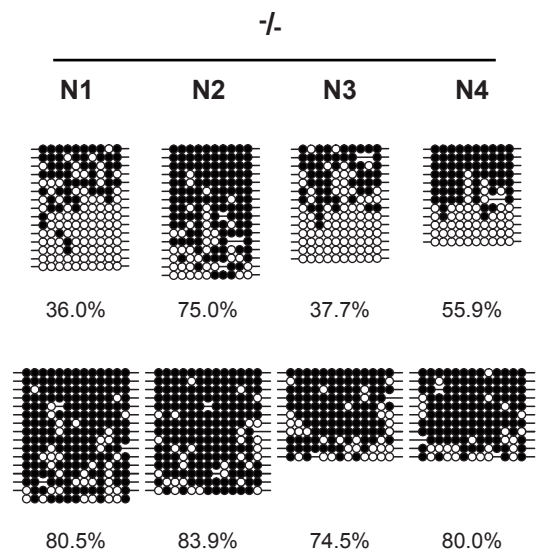

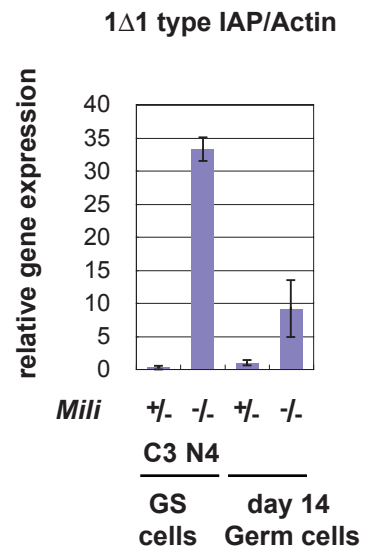

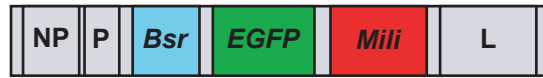

**A**

MILI-Res

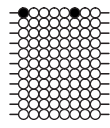

2.3%

**B**

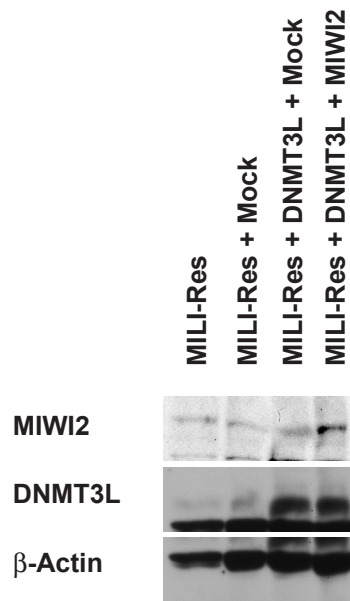

**C**

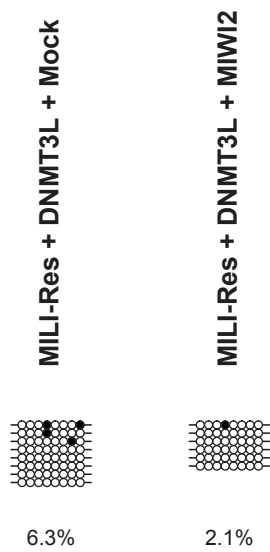

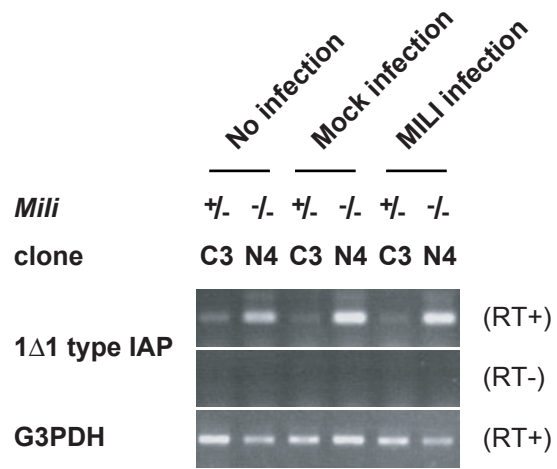



A

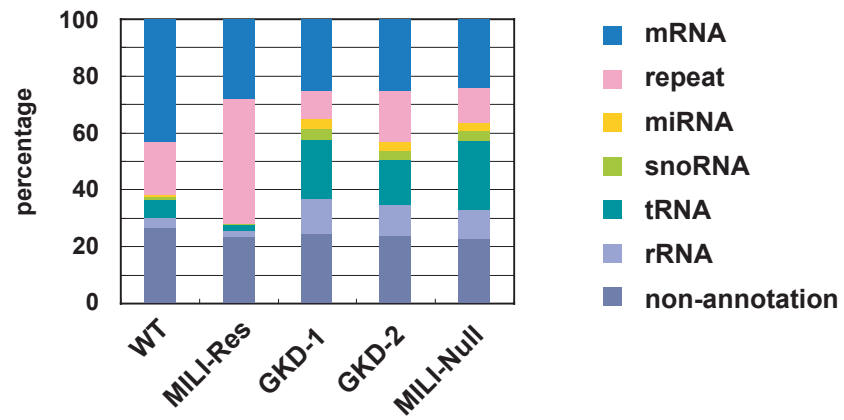

B

|                | WT      | MILI-Res | GKD-1   | GKD-2   | MILI-Null |
|----------------|---------|----------|---------|---------|-----------|
| rRNA           | 130718  | 101238   | 160288  | 161183  | 141474    |
| tRNA           | 240847  | 70886    | 270172  | 239171  | 326565    |
| snoRNA         | 31311   | 19730    | 54533   | 50241   | 50492     |
| miRNA          | 34413   | 14944    | 41999   | 45153   | 39613     |
| repeat         | 691496  | 1893630  | 132039  | 265980  | 162519    |
| mRNA           | 1611978 | 1211251  | 328322  | 378618  | 331647    |
| non-annotation | 993925  | 1016097  | 321599  | 358978  | 312048    |
| total reads    | 3734688 | 4327776  | 1308952 | 1499324 | 1364358   |



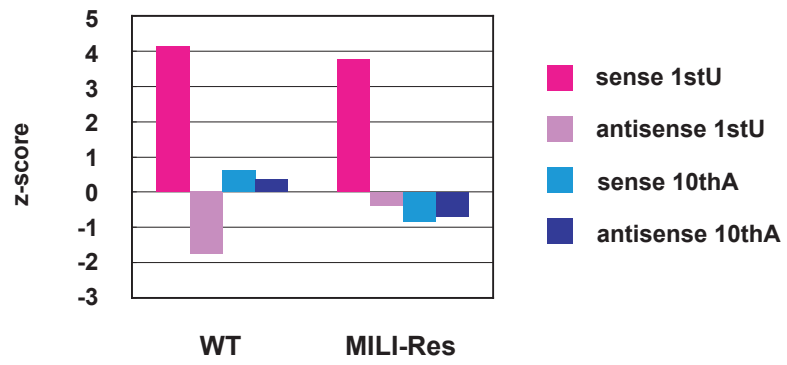

**A**

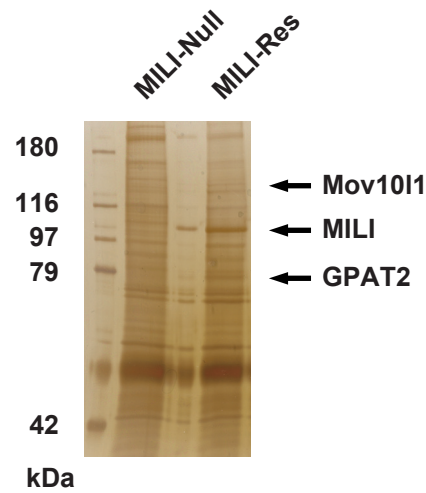

**B**

| Band 1            |                   |                                                                      |         |          |              |
|-------------------|-------------------|----------------------------------------------------------------------|---------|----------|--------------|
| Accession         | Entry             | Description                                                          | mW (Da) | Peptides | Coverage (%) |
| IPI:IP100118099.2 | IPI:IP100118099.2 | Mov1011 Uncharacterized protein                                      | 138643  | 14       | 10.9766      |
| Band 2            |                   |                                                                      |         |          |              |
| Accession         | Entry             | Description                                                          | mW (Da) | Peptides | Coverage (%) |
| IPI:IP100461359.2 | IPI:IP100461359.2 | Piwil2 Piwi like protein 2                                           | 109417  | 42       | 38.414       |
| Band 3            |                   |                                                                      |         |          |              |
| Accession         | Entry             | Description                                                          | mW (Da) | Peptides | Coverage (%) |
| IPI:IP100889266.3 | IPI:IP100889266.3 | Gpat2 Isoform 2 of Glycerol 3 phosphate acyltransferase 2 mitochondr | 88658   | 13       | 20.7026      |

**C**

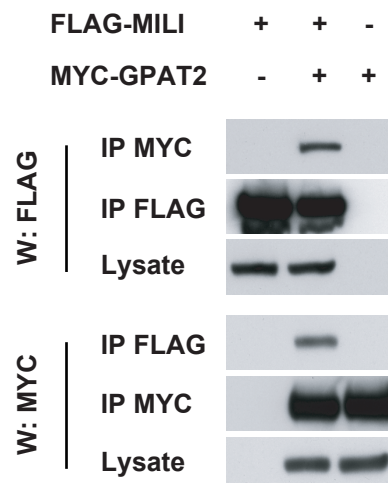

**A**

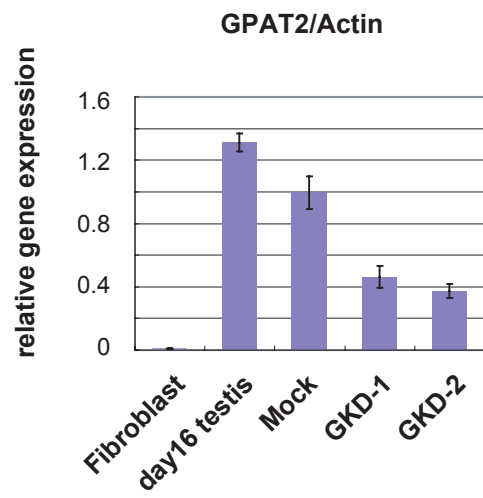

**B**

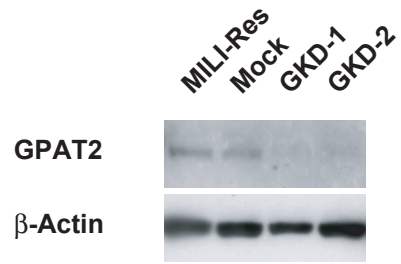

**C**

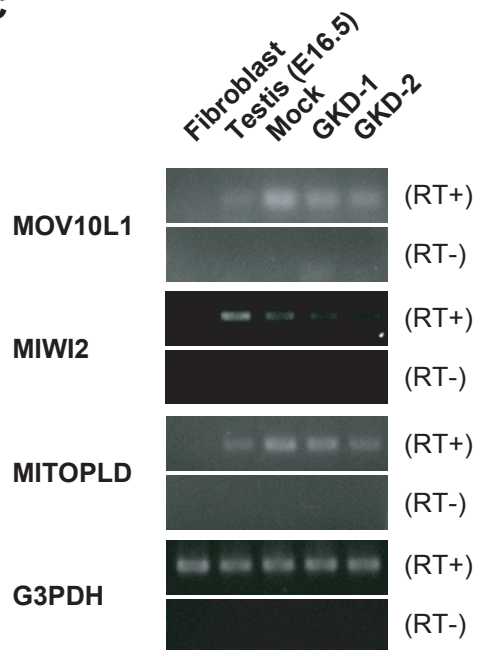

GKD-1 GKD-2 Mock

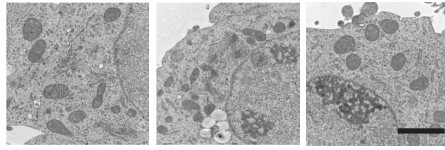

A

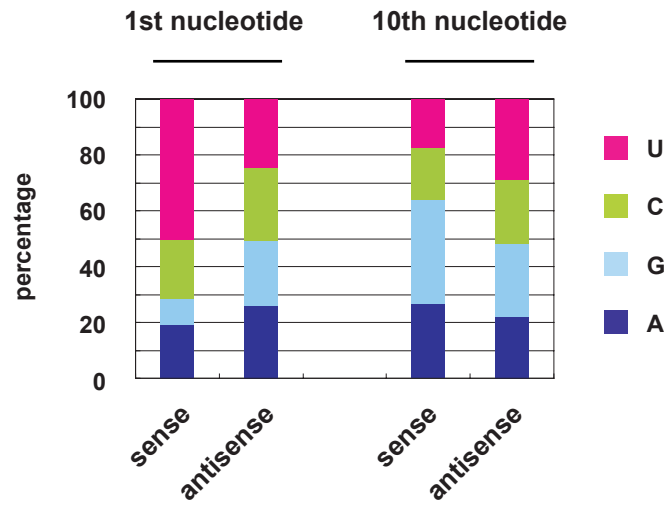

B

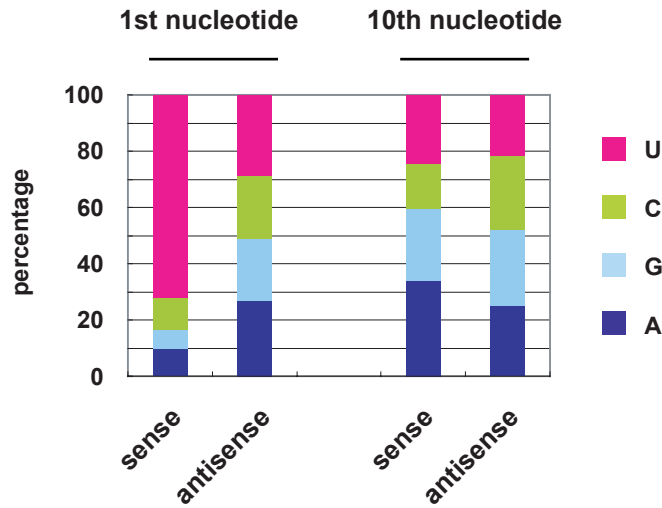

C

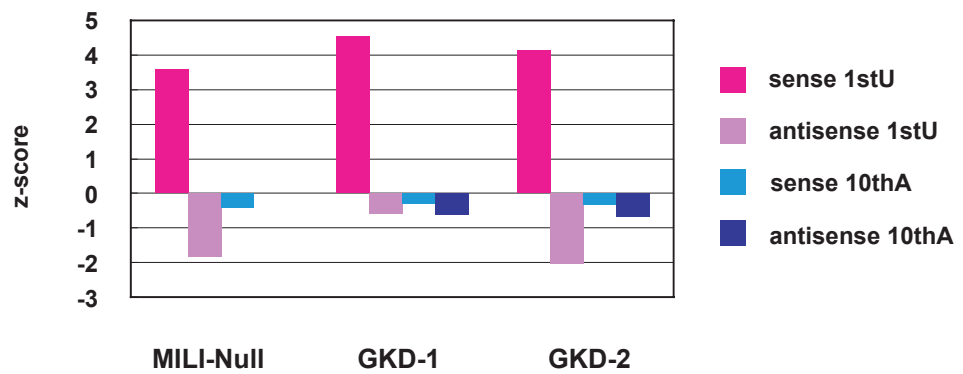

Supplement: supp_038521.113_SuppFigures.pdf [file supp_038521.113_SuppFigures.pdf]
