# Supplementary material
Source: PubMed Central journal article supplement (PMC3683914)
Supplement: supp_038521.113_SuppTab1.pdf [file supp_038521.113_SuppTab1.pdf]

## Supplemental Table.1

| WT GS cell |       |                     |          |                 |                             |
|------------|-------|---------------------|----------|-----------------|-----------------------------|
| #          | Chr   | Position            | Size, bp | Number of piRNA | Pre-pachtene piRNA cluster? |
| 1          | chr10 | 82794863-83076891   | 282029   | 3630            |                             |
| 2          | chr2  | 155868145-156077524 | 209380   | 3190            | yes                         |
| 3          | chr15 | 81631411-81879097   | 247687   | 3183            | yes                         |
| 4          | chr8  | 87339549-87621361   | 281813   | 2260            | yes                         |
| 5          | chr1  | 133882383-133948993 | 66611    | 2138            |                             |
| 6          | chr19 | 8780277-9043861     | 263585   | 1944            | yes                         |
| 7          | chr6  | 124973838-125232909 | 259072   | 1853            | yes                         |
| 8          | chr18 | 35716894-35856640   | 139747   | 1769            |                             |
| 9          | chr10 | 80604493-80883399   | 278907   | 1674            |                             |
| 10         | chr4  | 32648977-32930097   | 281121   | 1656            | yes                         |
| 11         | chr2  | 22853336-23090943   | 237608   | 1551            | yes                         |
| 12         | chr8  | 119711372-119739827 | 28456    | 1520            |                             |
| 13         | chr5  | 122654543-122954311 | 299769   | 1519            | yes                         |
| 14         | chr4  | 124300637-124654381 | 353745   | 1454            | yes                         |
| 15         | chr11 | 87235968-87369069   | 133102   | 1443            | yes                         |
| 16         | chr17 | 33947285-34099692   | 152408   | 1440            |                             |
| 17         | chr15 | 102087329-102181162 | 93834    | 1438            | yes                         |
| 18         | chr19 | 44621736-44667932   | 46197    | 1333            |                             |
| 19         | chr11 | 69781775-69871249   | 89475    | 1329            | yes                         |
| 20         | chr1  | 158552648-158763075 | 210428   | 1314            |                             |
| 21         | chr6  | 120697320-120902401 | 205082   | 1294            | yes                         |
| 22         | chr19 | 45036360-45153604   | 117245   | 1266            | yes                         |
| 23         | chr8  | 113640595-113696357 | 55763    | 1247            |                             |
| 24         | chr16 | 91629963-91708725   | 78763    | 1238            | yes                         |
| 25         | chr16 | 94630366-94715925   | 85560    | 1174            |                             |
| 26         | chr10 | 127445111-127606031 | 160921   | 1163            |                             |
| 27         | chr2  | 29776567-29924741   | 148175   | 1161            |                             |
| 28         | chr17 | 23930410-24238599   | 308190   | 1146            | yes                         |
| 29         | chr5  | 145847920-146075383 | 227464   | 1141            | yes                         |
| 30         | chr15 | 58706386-58779212   | 72827    | 1115            | yes                         |
| 31         | chr2  | 153035170-153270779 | 235610   | 1110            | yes                         |
| 32         | chr8  | 34662519-34772831   | 110313   | 1110            |                             |
| 33         | chr5  | 138527123-138785524 | 258402   | 1095            |                             |
| 34         | chr2  | 119304311-119625063 | 320753   | 1059            | yes                         |
| 35         | chr15 | 102238304-102290714 | 52411    | 1050            | yes                         |
| 36         | chr3  | 95392999-95485978   | 92980    | 1047            | yes                         |
| 37         | chr15 | 82119657-82206876   | 87220    | 1046            | yes                         |

|    |       |                     |        |      |     |
|----|-------|---------------------|--------|------|-----|
| 38 | chr1  | 95173923-95338733   | 164811 | 1035 | yes |
| 39 | chr15 | 78856096-78982094   | 125999 | 1034 | yes |
| 40 | chr16 | 17461194-17548053   | 86860  | 1033 |     |
| 41 | chr16 | 17235944-17286834   | 50891  | 1029 |     |
| 42 | chr9  | 108349987-108434342 | 84356  | 1005 | yes |
| 43 | chr4  | 151327852-151461865 | 134014 | 1000 | yes |
| 44 | chr2  | 164556698-164808752 | 252055 | 980  | yes |
| 45 | chr10 | 127720849-127911761 | 190913 | 968  | yes |
| 46 | chr11 | 57851143-57993931   | 142789 | 940  | yes |
| 47 | chr3  | 50966741-51089070   | 122330 | 939  | yes |
| 48 | chr4  | 116657297-116862604 | 205308 | 938  |     |
| 49 | chr8  | 88049880-88126928   | 77049  | 920  | yes |
| 50 | chr18 | 77990681-78029707   | 39027  | 918  |     |
| 51 | chr18 | 65783065-65816756   | 33692  | 916  |     |
| 52 | chr17 | 34963978-35166202   | 202225 | 905  |     |
| 53 | chr13 | 74441031-74507085   | 66055  | 903  | yes |
| 54 | chr7  | 134983704-135152640 | 168937 | 899  | yes |
| 55 | chr11 | 74605744-74672141   | 66398  | 896  | yes |
| 56 | chr11 | 117517415-117730018 | 212604 | 888  | yes |
| 57 | chr5  | 137391646-137615780 | 224135 | 887  | yes |
| 58 | chr19 | 44363932-44392914   | 28983  | 887  |     |
| 59 | chr10 | 79575375-79789778   | 214404 | 884  |     |
| 60 | chr1  | 187071900-187290832 | 218933 | 882  |     |
| 61 | chr5  | 130252723-130495658 | 242936 | 877  | yes |
| 62 | chr9  | 119325201-119403743 | 78543  | 877  | yes |
| 63 | chr6  | 113546589-113687962 | 141374 | 876  | yes |
| 64 | chr11 | 59218135-59297421   | 79287  | 872  |     |
| 65 | chr2  | 154267442-154420543 | 153102 | 871  | yes |
| 66 | chr1  | 134972148-135042654 | 70507  | 866  | yes |
| 67 | chr7  | 130110110-130159192 | 49083  | 864  |     |
| 68 | chr8  | 72273803-72357564   | 83762  | 852  |     |
| 69 | chr4  | 155149010-155281215 | 132206 | 850  |     |
| 70 | chr16 | 92052213-92117091   | 64879  | 843  | yes |
| 71 | chr15 | 80063912-80094690   | 30779  | 837  | yes |
| 72 | chr11 | 75461131-75590674   | 129544 | 830  | yes |
| 73 | chr3  | 30924074-31056122   | 132049 | 829  | yes |
| 74 | chr3  | 87682005-87809279   | 127275 | 829  | yes |
| 75 | chr7  | 4831812-5062931     | 231120 | 818  |     |
| 77 | chr6  | 29292427-29464810   | 172384 | 812  | yes |
| 76 | chr4  | 138813190-138968547 | 155358 | 812  | yes |

|     |       |                     |        |     |     |
|-----|-------|---------------------|--------|-----|-----|
| 78  | chr1  | 174270716-174314067 | 43352  | 799 | yes |
| 79  | chr5  | 108470950-108568280 | 97331  | 796 | yes |
| 80  | chr5  | 143605051-143699223 | 94173  | 795 |     |
| 81  | chr2  | 31992211-32190670   | 198460 | 794 | yes |
| 82  | chr6  | 128292111-128419087 | 126977 | 787 | yes |
| 83  | chr1  | 33793789-33883509   | 89721  | 782 |     |
| 84  | chr4  | 147888992-148002088 | 113097 | 777 |     |
| 85  | chr3  | 32410518-32650376   | 239859 | 775 | yes |
| 86  | chr16 | 36886232-36941491   | 55260  | 766 |     |
| 87  | chr10 | 127075818-127157911 | 82094  | 755 | yes |
| 88  | chr16 | 32215652-32326983   | 111332 | 748 | yes |
| 89  | chr3  | 68794687-68906158   | 111472 | 740 |     |
| 90  | chr16 | 31925083-32002998   | 77916  | 734 | yes |
| 91  | chr1  | 193576852-193737069 | 160218 | 730 | yes |
| 92  | chr17 | 88374434-88408569   | 34136  | 730 |     |
| 94  | chr11 | 35565312-35655257   | 89946  | 726 | yes |
| 93  | chr17 | 13081616-13143382   | 61767  | 726 | yes |
| 95  | chr4  | 124685802-124796428 | 110627 | 724 | yes |
| 96  | chr15 | 98350258-98399605   | 49348  | 722 | yes |
| 97  | chr4  | 128997743-129110207 | 112465 | 719 | yes |
| 98  | chr7  | 134685455-134762079 | 76625  | 717 | yes |
| 99  | chr12 | 111850249-111933565 | 83317  | 713 |     |
| 100 | chr15 | 81261137-81306604   | 45468  | 713 |     |

**MILI-Res GS cell**

| <b>#</b> | <b>Chr</b> | <b>Position</b>     | <b>Size, bp</b> | <b>Number of piRNA</b> | <b>Pre-pachtene piRNA cluster?</b> |
|----------|------------|---------------------|-----------------|------------------------|------------------------------------|
| 1        | chr10      | 82779177-83106915   | 327739          | 5006                   |                                    |
| 2        | chr1       | 133807142-133942982 | 135841          | 2974                   |                                    |
| 3        | chr2       | 155787622-156184341 | 396720          | 2814                   | yes                                |
| 4        | chr1       | 158526756-158786633 | 259878          | 2129                   |                                    |
| 5        | chr3       | 50977280-51098535   | 121256          | 2077                   | yes                                |
| 6        | chr1       | 95167146-95523630   | 356485          | 1796                   | yes                                |
| 7        | chr10      | 127452297-127929259 | 476963          | 1782                   | yes                                |
| 8        | chr4       | 32618826-32930380   | 311555          | 1660                   | yes                                |
| 9        | chr19      | 8782093-9051118     | 269026          | 1581                   | yes                                |
| 10       | chr7       | 30772624-30992400   | 219777          | 1522                   | yes                                |
| 11       | chr15      | 102002240-102180969 | 178730          | 1514                   | yes                                |
| 12       | chr16      | 92052562-92132819   | 80258           | 1503                   | yes                                |
| 13       | chr9       | 119301804-119413782 | 111979          | 1398                   | yes                                |
| 14       | chr11      | 60513365-60634665   | 121301          | 1379                   | yes                                |
| 15       | chr5       | 88982313-89212154   | 229842          | 1358                   | yes                                |
| 16       | chr11      | 75458845-75609280   | 150436          | 1352                   | yes                                |
| 17       | chr8       | 119702364-119739841 | 37478           | 1295                   |                                    |
| 18       | chr5       | 130245407-130506367 | 260961          | 1279                   | yes                                |
| 19       | chr16      | 8605711-8732804     | 127094          | 1274                   |                                    |
| 20       | chr19      | 41602523-41680462   | 77940           | 1264                   | yes                                |
| 21       | chr8       | 106866964-106976916 | 109953          | 1250                   |                                    |
| 22       | chr6       | 83249457-83355863   | 106407          | 1224                   |                                    |
| 23       | chr8       | 113459149-113567649 | 108501          | 1211                   |                                    |
| 24       | chr5       | 145822378-146086820 | 264443          | 1170                   | yes                                |
| 25       | chr3       | 95382184-95686615   | 304432          | 1161                   | yes                                |
| 26       | chr7       | 28451992-28679113   | 227122          | 1131                   | yes                                |
| 27       | chr8       | 113625947-113716525 | 90579           | 1126                   |                                    |
| 28       | chr1       | 95585800-95734593   | 148794          | 1114                   | yes                                |
| 29       | chr4       | 124472609-124799568 | 326960          | 1113                   | yes                                |
| 30       | chr3       | 65158173-65498899   | 340727          | 1109                   |                                    |
| 31       | chr5       | 138526915-138796109 | 269195          | 1108                   |                                    |
| 32       | chr15      | 102228638-102371292 | 142655          | 1100                   | yes                                |
| 33       | chr4       | 136063203-136149821 | 86619           | 1084                   | yes                                |
| 34       | chr13      | 97861782-98035927   | 174146          | 1072                   | yes                                |
| 35       | chr2       | 119373619-119608865 | 235247          | 1061                   | yes                                |
| 36       | chr7       | 129143678-129335547 | 191870          | 1059                   | yes                                |
| 37       | chr5       | 110509808-110802954 | 293147          | 1054                   | yes                                |
| 38       | chr3       | 30776278-31063102   | 286825          | 1041                   | yes                                |

|    |       |                     |        |      |     |
|----|-------|---------------------|--------|------|-----|
| 39 | chr4  | 154885554-155135173 | 249620 | 1037 | yes |
| 40 | chr8  | 127236554-127444159 | 207606 | 1027 | yes |
| 41 | chr6  | 125026063-125268410 | 242348 | 1001 | yes |
| 42 | chr11 | 3179236-3260528     | 81293  | 994  | yes |
| 43 | chr19 | 40901913-41003574   | 101662 | 972  |     |
| 44 | chr10 | 127092698-127187236 | 94539  | 966  | yes |
| 45 | chr8  | 112219010-112262654 | 43645  | 959  |     |
| 46 | chr15 | 81623237-81777322   | 154086 | 956  | yes |
| 47 | chr11 | 117551010-117729263 | 178254 | 938  | yes |
| 48 | chr6  | 72257393-72396947   | 139555 | 936  | yes |
| 49 | chr7  | 148407954-148694682 | 286729 | 933  |     |
| 50 | chr13 | 41360724-41736528   | 375805 | 932  |     |
| 51 | chr4  | 59703357-59829258   | 125902 | 916  |     |
| 52 | chr8  | 82162345-82243575   | 81231  | 916  | yes |
| 53 | chr8  | 34650133-34766707   | 116575 | 915  |     |
| 54 | chr7  | 134887321-135137102 | 249782 | 912  | yes |
| 55 | chr1  | 193555190-193737461 | 182272 | 905  | yes |
| 56 | chr7  | 28946959-29222822   | 275864 | 904  | yes |
| 57 | chr3  | 102799820-102923590 | 123771 | 896  | yes |
| 58 | chr10 | 57840588-58007755   | 167168 | 891  |     |
| 59 | chr15 | 79964727-80093667   | 128941 | 889  | yes |
| 60 | chr6  | 86923808-87070245   | 146438 | 882  | yes |
| 61 | chr1  | 60480666-60590178   | 109513 | 881  | yes |
| 62 | chr19 | 45000870-45121624   | 120755 | 871  | yes |
| 63 | chr16 | 91611910-91708852   | 96943  | 866  | yes |
| 64 | chr15 | 58704103-58802569   | 98467  | 856  | yes |
| 65 | chr16 | 94586308-94725910   | 139603 | 853  |     |
| 66 | chr6  | 92086021-92167551   | 81531  | 852  | yes |
| 67 | chr11 | 106002482-106152923 | 150442 | 850  |     |
| 68 | chrX  | 101123422-101176554 | 53133  | 848  | yes |
| 69 | chr3  | 88696454-88925973   | 229520 | 842  |     |
| 70 | chr10 | 86246449-86427842   | 181394 | 840  | yes |
| 71 | chr12 | 3875203-3991537     | 116335 | 838  |     |
| 72 | chr11 | 105888152-105945951 | 57800  | 835  | yes |
| 73 | chr2  | 28902017-29037952   | 135936 | 825  | yes |
| 74 | chr8  | 88049870-88197999   | 148130 | 819  | yes |
| 75 | chr5  | 151298279-151481526 | 183248 | 818  |     |
| 76 | chr12 | 77413354-77564000   | 150647 | 816  | yes |
| 77 | chr9  | 121566541-121680274 | 113734 | 816  |     |
| 78 | chr8  | 87480577-87623692   | 143116 | 807  | yes |

|     |       |                     |        |     |     |
|-----|-------|---------------------|--------|-----|-----|
| 79  | chr1  | 134981489-135069384 | 87896  | 806 | yes |
| 80  | chr2  | 22823507-23069479   | 245973 | 800 | yes |
| 81  | chr3  | 22069948-22114818   | 44871  | 799 |     |
| 82  | chr16 | 17452111-17545308   | 93198  | 797 |     |
| 83  | chr11 | 69781831-69869512   | 87682  | 795 | yes |
| 84  | chr16 | 36877448-36932916   | 55469  | 791 |     |
| 85  | chr15 | 82110579-82206431   | 95853  | 789 | yes |
| 86  | chr8  | 109505208-109610752 | 105545 | 777 | yes |
| 87  | chr14 | 65797328-65854612   | 57285  | 777 |     |
| 88  | chr13 | 55314567-55477125   | 162559 | 776 | yes |
| 89  | chr6  | 113527049-113688501 | 161453 | 774 | yes |
| 90  | chr11 | 35582711-35637934   | 55224  | 774 | yes |
| 91  | chr18 | 44555608-44589516   | 33909  | 774 | yes |
| 92  | chr7  | 130110049-130182851 | 72803  | 769 |     |
| 93  | chr16 | 32352888-32499586   | 146699 | 768 | yes |
| 94  | chr11 | 74598500-74672141   | 73642  | 763 | yes |
| 95  | chr2  | 163826353-163997697 | 171345 | 758 | yes |
| 96  | chr2  | 24990177-25142522   | 152346 | 757 |     |
| 97  | chrX  | 148291056-148497424 | 206369 | 756 |     |
| 98  | chr8  | 108616016-108761515 | 145500 | 753 | yes |
| 99  | chr18 | 34442754-34506785   | 64032  | 746 | yes |
| 100 | chr13 | 55746772-55835384   | 88613  | 745 | yes |

**10d testis**

| <b>#</b> | <b>Chr</b> | <b>Position</b>     | <b>Size, bp</b> | <b>Number of piRNA</b> |
|----------|------------|---------------------|-----------------|------------------------|
| 1        | chr9       | 119278512-119427132 | 148621          | 2737                   |
| 2        | chr3       | 50987685-51095282   | 107598          | 2265                   |
| 3        | chr15      | 74168655-74348773   | 180119          | 2205                   |
| 4        | chr15      | 102006695-102162911 | 156217          | 2118                   |
| 5        | chr15      | 81607339-81861907   | 254569          | 1988                   |
| 6        | chr2       | 153016792-153280959 | 264168          | 1837                   |
| 7        | chr19      | 4576234-4860624     | 284391          | 1833                   |
| 8        | chr1       | 95586008-95755027   | 169020          | 1730                   |
| 9        | chr11      | 60510804-60625448   | 114645          | 1716                   |
| 10       | chr11      | 3154548-3260474     | 105927          | 1597                   |
| 11       | chr9       | 27117020-27167950   | 50931           | 1566                   |
| 12       | chr6       | 120670935-121006444 | 335510          | 1481                   |
| 13       | chr9       | 98183040-98281583   | 98544           | 1443                   |
| 14       | chr4       | 125980694-126170217 | 189524          | 1402                   |
| 15       | chr6       | 92055282-92174557   | 119276          | 1316                   |
| 16       | chr7       | 129164084-129334995 | 170912          | 1294                   |
| 17       | chr11      | 105859639-105958322 | 98684           | 1284                   |
| 18       | chr2       | 155982738-156083382 | 100645          | 1268                   |
| 19       | chr16      | 32066971-32503620   | 436650          | 1261                   |
| 20       | chr1       | 167748892-167847103 | 98212           | 1225                   |
| 21       | chr11      | 98715081-98856657   | 141577          | 1189                   |
| 22       | chr2       | 31507772-31700989   | 193218          | 1177                   |
| 23       | chr2       | 173485608-173652862 | 167255          | 1177                   |
| 24       | chr11      | 117510495-117630279 | 119785          | 1173                   |
| 25       | chr14      | 16638700-16744987   | 106288          | 1171                   |
| 26       | chr11      | 109224481-109368745 | 144265          | 1164                   |
| 27       | chr17      | 56120794-56617837   | 497044          | 1148                   |
| 28       | chr2       | 120410009-120599599 | 189591          | 1144                   |
| 29       | chr6       | 128271193-128460042 | 188850          | 1133                   |
| 30       | chr7       | 28956054-29015494   | 59441           | 1116                   |
| 31       | chr6       | 72149200-72340602   | 191403          | 1104                   |
| 32       | chr6       | 116326722-116643449 | 316728          | 1068                   |
| 33       | chr2       | 181237111-181350706 | 113596          | 1063                   |
| 34       | chr4       | 154937193-155128101 | 190909          | 1063                   |
| 35       | chr17      | 35918295-36177391   | 259097          | 1062                   |
| 36       | chr9       | 43883472-43994699   | 111228          | 1060                   |
| 37       | chr2       | 129625538-129701855 | 76318           | 1059                   |
| 38       | chr4       | 136095053-136109714 | 14662           | 1043                   |

|    |       |                     |        |      |
|----|-------|---------------------|--------|------|
| 39 | chr15 | 79962588-80117183   | 154596 | 1035 |
| 40 | chr15 | 80748990-80829473   | 80484  | 1030 |
| 41 | chr7  | 86403666-86545057   | 141392 | 1005 |
| 42 | chr2  | 154316297-154440886 | 124590 | 986  |
| 43 | chr8  | 109505054-109600686 | 95633  | 976  |
| 44 | chr12 | 4085986-4243878     | 157893 | 972  |
| 45 | chr2  | 164593051-164801406 | 208356 | 958  |
| 46 | chr10 | 127080896-127204546 | 123651 | 945  |
| 47 | chr18 | 34849501-35116519   | 267019 | 943  |
| 48 | chr4  | 132685588-132797313 | 111726 | 939  |
| 49 | chr2  | 31917420-32135902   | 218483 | 933  |
| 50 | chr13 | 55385843-55466684   | 80842  | 928  |
| 51 | chr2  | 33220543-33350407   | 129865 | 927  |
| 52 | chr11 | 95590728-95633596   | 42869  | 921  |
| 53 | chr19 | 41627010-41904507   | 277498 | 892  |
| 54 | chr1  | 191655117-191744979 | 89863  | 891  |
| 55 | chr2  | 28674252-28716321   | 42070  | 883  |
| 56 | chr7  | 134969672-135087360 | 117689 | 874  |
| 57 | chr15 | 75446399-75498348   | 51950  | 870  |
| 58 | chr6  | 115705268-115805068 | 99801  | 861  |
| 59 | chr5  | 145857000-146070441 | 213442 | 855  |
| 60 | chr6  | 54543144-54677136   | 133993 | 854  |
| 61 | chr11 | 74630951-74726605   | 95655  | 837  |
| 62 | chr8  | 127321578-127450403 | 128826 | 837  |
| 63 | chr13 | 64256800-64413630   | 156831 | 825  |
| 64 | chr4  | 120518433-120647048 | 128616 | 822  |
| 65 | chr1  | 136605617-136702346 | 96730  | 815  |
| 66 | chr16 | 96179070-96300464   | 121395 | 809  |
| 67 | chr1  | 134981439-135082149 | 100711 | 806  |
| 68 | chr2  | 30762558-30843468   | 80911  | 792  |
| 69 | chr8  | 11578765-11715343   | 136579 | 782  |
| 70 | chr17 | 27809772-28114968   | 305197 | 777  |
| 71 | chr4  | 45355524-45457640   | 102117 | 771  |
| 72 | chr5  | 25146345-25249179   | 102835 | 770  |
| 73 | chr13 | 97960500-98052698   | 92199  | 766  |
| 74 | chr8  | 73779928-73935866   | 155939 | 760  |
| 75 | chr11 | 88842465-88924328   | 81864  | 755  |
| 76 | chr6  | 113522724-113716165 | 193442 | 735  |
| 77 | chr14 | 34963671-35045253   | 81583  | 726  |
| 78 | chr15 | 102229804-102385663 | 155860 | 717  |



|     |       |                     |        |     |
|-----|-------|---------------------|--------|-----|
| 79  | chr19 | 8781556-9030312     | 248757 | 716 |
| 80  | chr7  | 114338765-114431778 | 93014  | 708 |
| 81  | chr2  | 163250594-163500869 | 250276 | 705 |
| 82  | chr6  | 86946215-87007671   | 61457  | 684 |
| 83  | chr11 | 69787657-69860100   | 72444  | 679 |
| 84  | chr2  | 118687854-118768301 | 80448  | 678 |
| 85  | chr4  | 151629939-151724636 | 94698  | 675 |
| 86  | chr9  | 96041047-96123547   | 82501  | 675 |
| 87  | chr8  | 127247090-127302156 | 55067  | 672 |
| 88  | chr3  | 96616908-96718405   | 101498 | 667 |
| 89  | chr1  | 174271550-174319691 | 48142  | 661 |
| 90  | chr9  | 21296856-21456344   | 159489 | 652 |
| 91  | chr11 | 72548814-72617522   | 68709  | 650 |
| 92  | chr15 | 72908632-72968588   | 59957  | 649 |
| 93  | chr6  | 47730623-47876555   | 145933 | 641 |
| 94  | chr15 | 82107491-82204911   | 97421  | 637 |
| 95  | chr13 | 49857802-49942635   | 84834  | 623 |
| 96  | chr10 | 86242304-86410019   | 167716 | 618 |
| 97  | chr10 | 77591675-77775080   | 183406 | 611 |
| 98  | chr15 | 78737015-78890836   | 153822 | 610 |
| 99  | chr13 | 41701386-41736586   | 35201  | 600 |
| 100 | chr3  | 32219458-32284889   | 65432  | 595 |
